# Supplementary material
Source: PubMed Central journal article supplement (PMC2821045)
Supplement: NIHMS168733-supplement-01.pdf [file NIHMS168733-supplement-01.pdf]

**Inventory Supplemental Information**

Supplemental Data

7 Figures

Supplemental Experimental Procedures

## SUPPLEMENTAL DATA

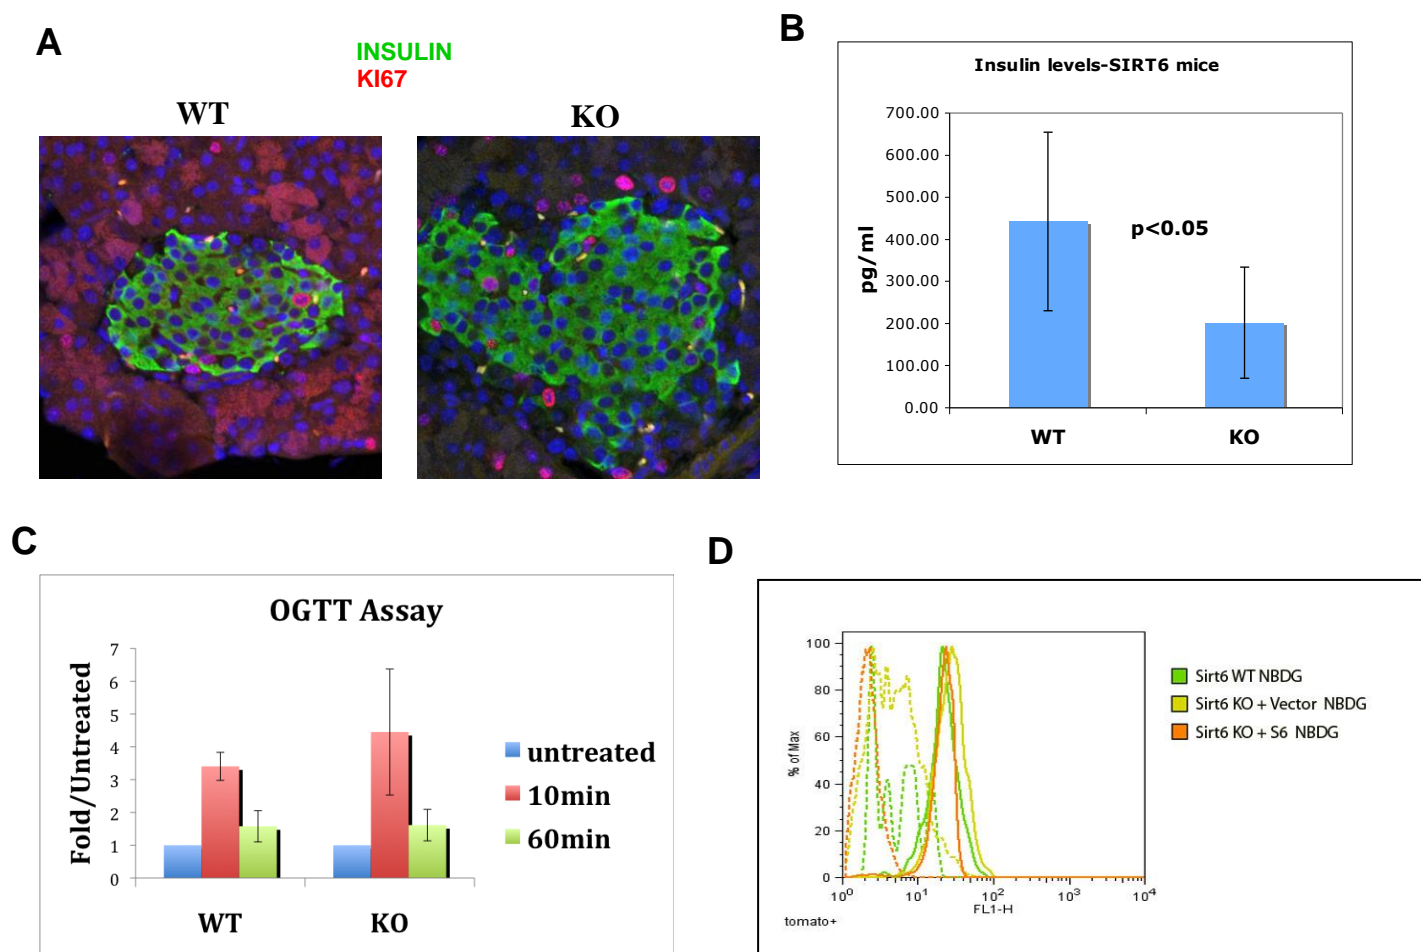

**Figure S1 related to Figure 1. Normal beta islets, hypoinsulinemia and normal glucose absorption in SIRT6 deficient mice.**

**A-** Pancreas from SIRT6 wild type (WT) and KO mice were stained with the proliferation marker KI67 (red), and insulin (green) to distinguish beta islets, as published (Nir et al., 2007).

**B-** Insulin was measured in blood of SIRT6 wild type (WT) and KO mice, using 20 days old animals.  $n = 6$  each genotype. Error bars indicate the standard error of the mean.

**C-** Oral Glucose Tolerance Test (OGTT). 2g/kg weight of glucose was given orally to SIRT6 wild type (WT) and KO mice. Blood was collected at the indicated times, and glucose level measured.

**D-** Re-expression of SIRT6 rescues the glucose uptake defect in SIRT6 deficient MEFs. SIRT6 KO cells were infected with a SIRT6 expressing-lentivirus. and glucose uptake was measured following 1 hr. incubation with NBDG ( $p < 0.005$ ).

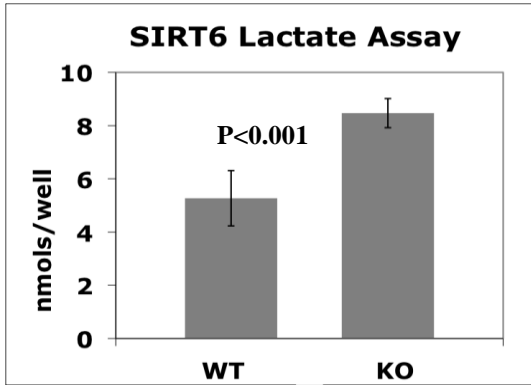

**Figure S2 related to Figure 2.**

**Increased lactate in SIRT6 deficient MEFs**

Supernatant was collected 24hr. after seeding  $1 \times 10^6$  cells of each genotype, and used in the colorimetric Lactate Assay Kit (BioVision). O.D. was measured at 570nm, 30 min. after addition of substrate.

**A****WT KO**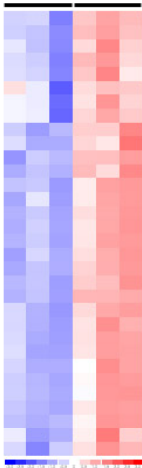

trans-acting transcription factor 3  
 zinc finger and BTB domain containing 16  
 sema domain, immunoglobulin domain (Ig), transmembrane domain  
 Notch gene homolog 1 (Drosophila)  
 zinc finger and BTB domain containing 16  
 chordin-like 1  
 Core binding factor beta  
 Quaking  
 muscibelin-like 1 (Drosophila)  
 Bone morphogenetic protein receptor, type 1A  
 Guanine nucleotide binding protein, alpha 12  
 AT motif binding factor 1  
 microtubule associated serine/threonine kinase 2  
 P21 (CDKN1A)-activated kinase 1  
 ankyrin 3, epithelial  
 ankyrin 3, epithelial  
 ankyrin 3, epithelial // RIKEN cDNA 2900054D09 gene  
 Heathy proteinase sensitive fusion protein attachment protein alpha  
 ubiquitin-conjugating enzyme E2B, RAD6 homology (S. cerevisiae)  
 myeloid leukemia factor 1  
 interleukin 11  
 chordin-like 1  
 myocardin  
 sema domain, immunoglobulin domain (Ig), transmembrane domain  
 Hmyn downstream regulated gene 1  
 guanine nucleotide binding protein, alpha 13  
 fibronectin, FNase A family 4  
 proacrosin binding protein  
 ephregulin  
 glycogen synthase kinase 3 beta  
 fibroblast growth factor 9  
 glutamate receptor ionotropic, NMDA3A

cell differentiation

**WT KO**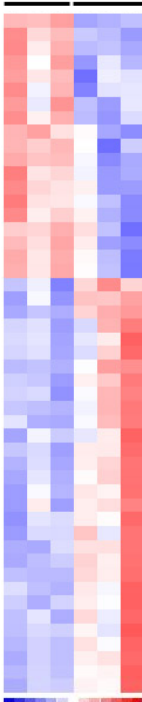

PevO protein-like 5  
 ligase IV, DNA, ATP-dependent  
 claspin homolog (Xenopus laevis)  
 polymerase (DNA directed), delta 1, catalytic subunit  
 O-6-methylguanine-DNA methyltransferase  
 RAD51-like 1 (S. cerevisiae)  
 breast cancer 1  
 transition protein 1  
 MMS1 endonuclease homolog (yeast)  
 FuvB-like protein 2  
 polymerase (DNA directed), kappa  
 X-ray repair complementing defective repair in Chinese hamster cells 6  
 tumor necrosis factor, alpha-induced protein 1 (endothelial)  
 poly (ADP-ribose) polymerase family member 1  
 eukaryotic translation elongation factor 1 epsilon 1  
 general transcription factor IIF, polypeptide 3  
 nucleic acid phosphate linked moiety X-type motif 1  
 procollagen, type VI, alpha 3  
 three prime repair exonuclease 2  
 apurinic/apyrimidinic endonuclease 2  
 exportin 5  
 ubiquitin-conjugating enzyme E2B, RAD6 homology (S. cerevisiae)  
 polymerase (DNA directed), gamma 2, accessory subunit  
 xeroderma pigmentosum, complementation group C  
 Ataxia telangiectasia and Rad3 related  
 ubiquitin-conjugating enzyme E2B, RAD6 homology (S. cerevisiae)  
 cryptochrome 1 (photolyase-like)  
 PRP19/P504 pre-mRNA processing factor 19 homolog (S. cerevisiae)  
 PEB-3-like, catalytic subunit of DNA polymerase zeta RAD54 like  
 chonotom sulfate proteoglycan 6  
 UV radiation resistance associated gene  
 splicing factor proline/glutamine rich  
 PRP19/P504 pre-mRNA processing factor 19 homolog (S. cerevisiae)  
 PRP19/P504 pre-mRNA processing factor 19 homolog (S. cerevisiae)  
 ligase III, DNA, ATP-dependent  
 Rad51 homolog c (S. cerevisiae)  
 MMS19 (MMS19 S. cerevisiae)-like  
 RIKEN cDNA 5620401H05 gene  
 ankyrin repeat domain 17  
 RAD52 homolog (S. cerevisiae)  
 mutS homolog 2 (E. coli)  
 CCAAT/enhancer binding protein (C/EBP), gamma  
 excision repair cross-complementing rodent repair deficiency  
 RAD54 like (S. cerevisiae)  
 eukaryotic translation initiation factor 5B  
 RAD54 like (S. cerevisiae)  
 RAD23a homolog (S. cerevisiae)  
 splicing factor proline/glutamine rich  
 splicing factor proline/glutamine rich

DNA Repair

**WT KO**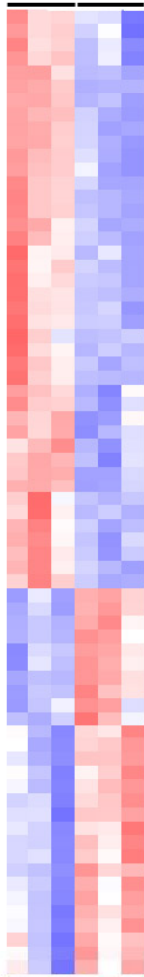

prostaglandin F2 receptor negative regulator  
 adenylate cyclase 3  
 GDP-mannose pyrophosphorylase B  
 expressed in non-metastatic cells 5, protein  
 5-pyruvyl-tetrahydropterin synthase  
 eukaryotic translation initiation factor 2, subunit 3  
 RIKEN cDNA 1700011K15 gene  
 3-hydroxy-3-methylglutaryl-Coenzyme A synthase 1  
 S-adenosylmethionine decarboxylase 1  
 3-hydroxy-3-methylglutaryl-Coenzyme A synthase 1  
 fatty acid desaturase 2  
 hydroxymethylglutamate synthase  
 S-adenosylmethionine decarboxylase 1  
 stearyl-Coenzyme A desaturase 1  
 1-acylglycerol-3-phosphate O-acyltransferase 2  
 3-oxoacyl-CoA synthase, mitochondrial  
 glutamyl-tRNA synthetase (glutamine-hydrolyzing)-like 1  
 3-hydroxy-3-methylglutaryl-Coenzyme A synthase 1  
 cytidylate kinase  
 quaking  
 ornithine decarboxylase, structural 1  
 phosphoserine phosphatase  
 transmembrane 7 superfamily member 2  
 threonyl-tRNA synthetase-like 1  
 ribosomal protein S6  
 phosphoenolpyruvate carboxylase 1, cytosolic  
 phosphoenolpyruvate kinase  
 alanyl-tRNA synthetase domain containing 1  
 hydroxysteroid (17-beta) dehydrogenase 7  
 B. subtilis /GEN=capB, Jof /DB\_XREF=gb:L38424.1  
 cDNA sequence BC016495  
 basic leucine zipper and W2 domains 2  
 gephyrin  
 arachidonate 15-lipoxygenase  
 similar to X-linked eukaryotic translation initiation factor 1A  
 proline dehydrogenase (oxidase) 2  
 6-pyruvyl-tetrahydropterin synthase  
 eukaryotic translation initiation factor 4, gamma 2  
 histidyl-tRNA synthetase-like  
 ribonucleotide reductase M2 B (TP53 inducible)  
 DPH5 homolog (S. cerevisiae)  
 ST3 beta-galactoside alpha-2,3-sialyltransferase 6  
 angiotensinogen (serpin peptidase inhibitor, clade A, member 8)  
 ATPase, H<sup>+</sup>-transporting, lysosomal v0 subunit c2  
 fucosyltransferase 9  
 Mucin related protein  
 1-acylglycerol-3-phosphate O-acyltransferase 3  
 UDP-Gal beta Gal beta 1,3-galactosyltransferase, polypeptide 6  
 Ni2 transcription factor related, locus 5 (Drosophila)  
 Adenylate cyclase 3  
 torin family 3, member A  
 Phosphatidylinositol glycan, class L  
 dylanin 3  
 lipolic acid synthetase  
 eukaryotic translation initiation factor 2a  
 mitochondrial ribosomal protein L3  
 lipolic acid synthetase  
 elongation factor Tu GTP binding domain containing 2  
 uridine-cytidine kinase 2  
 mitochondrial ribosomal protein S10  
 ATPase, H<sup>+</sup>-transporting, lysosomal v1 subunit D  
 mitochondrial ribosomal protein L3  
 1-acylglycerol-3-phosphate O-acyltransferase 3  
 ATPase, H<sup>+</sup>-transporting, lysosomal v1 subunit D  
 Aldehyde dehydrogenase 1 family, member L1  
 sphingosine kinase 2  
 DEAD (Asp-Glu-Ala-Asp) box polypeptide 1  
 mitochondrial ribosomal protein S9  
 hypoxanthine guanine phosphoribosyl transferase 1  
 uroporphyrinogen decarboxylase

Biosynthesis

**WT KO**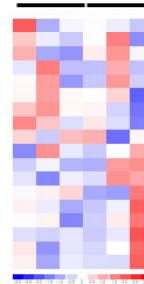

NFkB target genes

**WT KO**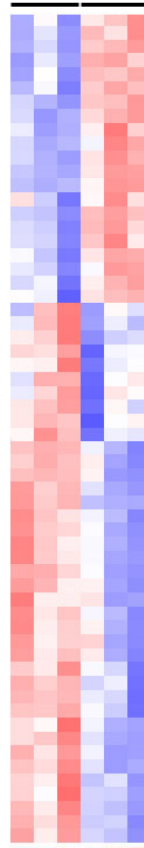

Cell Proliferation

PHLDB2  
 HEY1  
 CLIC4  
 CFB  
 CLIC4  
 CLIC4  
 IAP2  
 ELK3  
 ZBTB4  
 MMSOD2  
 CYLD  
 IL1A  
 TIFA  
 IAP1  
 NFKBIA  
 IER3  
 CYLD  
 PPP1R15B

adrenomedullin  
 protein kinase C, theta  
 aristales related homeobox gene (Drosophila)  
 angiotensinogen (serpin peptidase inhibitor, clade A, member 8)  
 SET domain, bifurcated 1  
 cell division cycle 2-like 5 (cholesterase-related cell division controller)  
 cullin 4A  
 CREBBP/EP300 inhibitory protein 2  
 fibroblast growth factor 9  
 tetraspanin 5  
 myocardin  
 ephregulin  
 glycogen synthase kinase 3 beta  
 jagged 1  
 zinc finger and BTB domain containing 16  
 Notch gene homolog 1 (Drosophila)  
 zinc finger and BTB domain containing 16  
 phosphatase and tensin homolog  
 Mortality factor 4 like 1  
 immunoglobulin heavy chain 1a (serum IgG2a)  
 pleiotrophin  
 Fc gamma rich element binding protein B  
 vascular endothelial growth factor C  
 fibroblast growth factor receptor 3  
 tumor necrosis factor (ligand) superfamily, member 13b  
 laminin B1 subunit 1  
 signal transducer and activator of transcription 6  
 fibroblast growth factor receptor 3  
 mizzled homolog 9 (Drosophila)  
 Interleukin 1 beta  
 Opioid receptor, sigma 1  
 MAD homolog 3 (Drosophila)  
 heparin-binding EGF-like growth factor  
 neurofibromatosis 2  
 CCAAT/enhancer binding protein (C/EBP), alpha  
 protein kinase, cAMP dependent regulatory, type II beta  
 homeodomain interacting protein kinase 2  
 homeodomain interacting protein kinase 2  
 ornithine decarboxylase, structural 1  
 ornithine decarboxylase, structural 1  
 Janus kinase 2  
 programmed cell death 1 ligand 2  
 immunoglobulin heavy chain 1a (serum IgG2a)  
 homeodomain interacting protein kinase 2  
 eukaryotic translation elongation factor 1 epsilon 1  
 tetraspanin 31  
 thymus cell antigen 1, theta  
 homeodomain interacting protein kinase 2  
 Fc receptor, IgG, low affinity, IIb  
 procollagen, type XVIII, alpha 1  
 protein kinase, cAMP dependent regulatory, type II beta  
 Opioid receptor, sigma 1  
 myc induced nuclear antigen  
 DNA segment, Chr 17, Wayne State University 104, expressed  
 immunoglobulin heavy chain 6 (heavy chain of IgM)  
 protein kinase C, delta  
 CD74 antigen (invariant polypeptide of major histocompatibility  
 pleiotrophin  
 procollagen, type XVIII, alpha 1  
 transforming growth factor, beta 2

**B**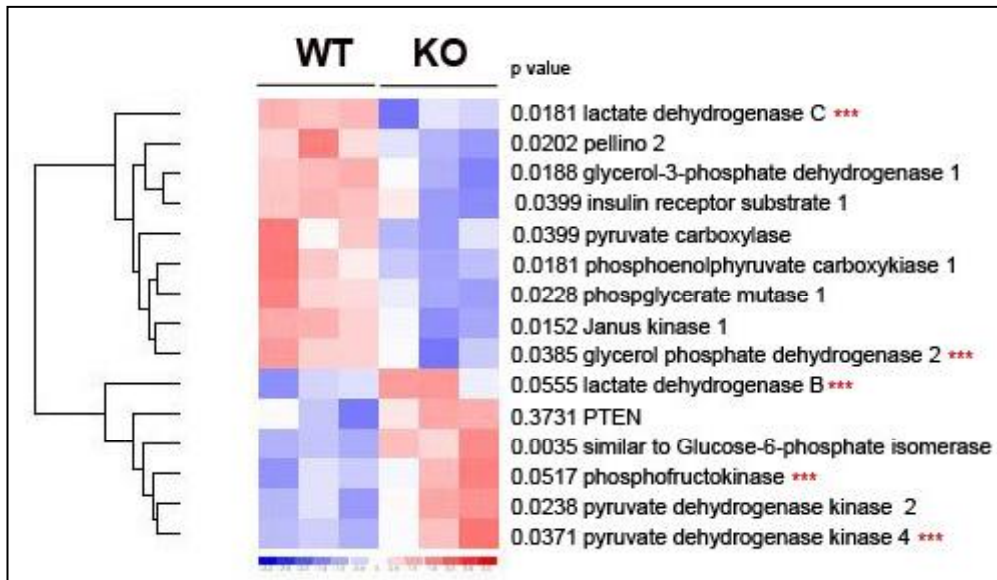

### Figure S3 related to Figure 3. Expression array analysis in SIRT6 muscle

**A.** RNA was prepared from muscle of three SIRT6 wild type and KO mice, and hybridized onto an Affymetrix GeneChip Mouse Genome 430 2.0 Array. Fold-change threshold was set to 2. The clustering figures were generated using dChip2006 Hierarchical clustering feature, and genes in each of these pathways were filtered using the dChip Software Tool Analysis. Note lack of statistical differences in expression of NF- $\kappa$ B targets between WT and KO ES cells.

**B.** Glucose metabolism array analysis in SIRT6 muscle. RNA was prepared as described in Supplemental Figure 3A. Genes were filtered using a custom-prepared filter for glucose metabolism (196 genes analyzed). Shown in here are the genes with the highest p-values (main glycolytic genes are highlighted with red asterisks).

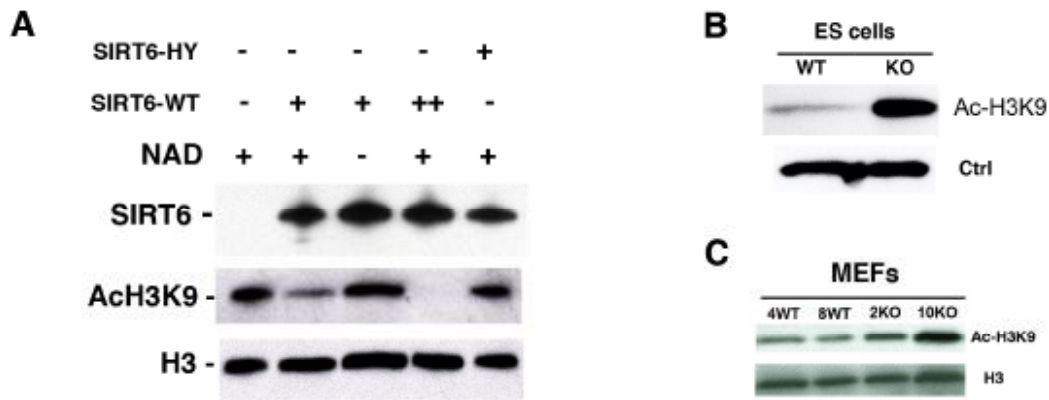

**Figure S4 related to Figure 3. SIRT6 functions as a histone H3K9 deacetylase *in vitro* and *in vivo*.**

**A.** In vitro deacetylation assay. Flag-tagged purified SIRT6 was incubated with 10 $\mu$ g Hela-purified histones (Millipore) for 1hr. at 37<sup>0</sup>C, in the presence or absence of NAD. Western blots were developed with the indicated antibodies.

**B-C.** Whole cell extracts from SIRT6 wild type (WT) and KO ES cells (B) and MEFs (C) were blot with the indicated antibodies.

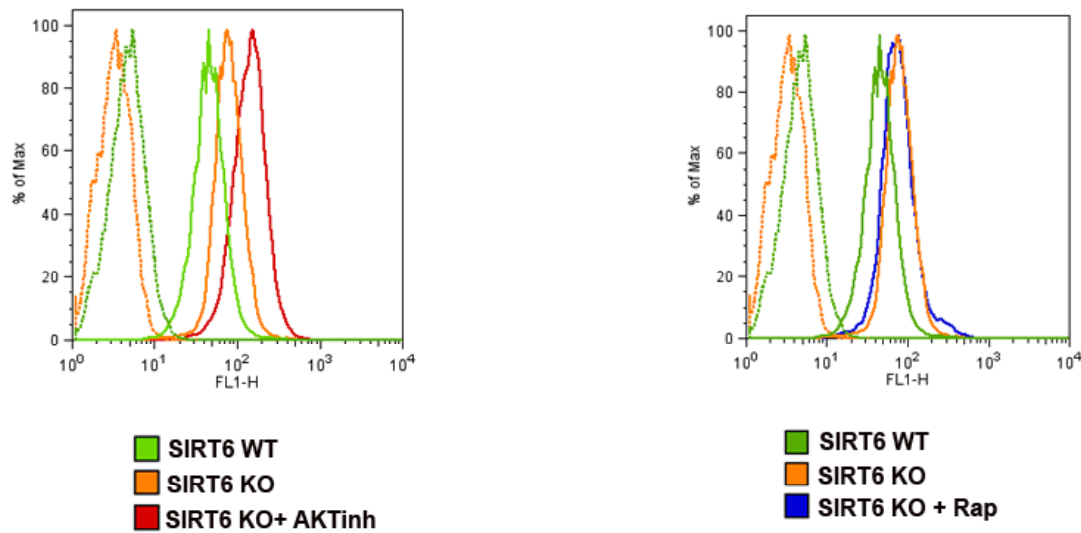

**Figure S5 related to Figure 4. Treatment with AKT inhibitor or Rapamycin (mTOR inhibitor) do not rescue the glucose uptake defect in SIRT6 deficient cells.**

SIRT6 wild type (WT) and KO ES cells were grown in the presence of the fluorescent glucose analog NBDG for 1 hr., and KO cells were either left untreated or pre-treated for 24hr. with 20 $\mu$ M AKT inhibitor XI (Calbiochem) (left panel) or 20 nM Rapamycin (right panel). Glucose uptake was then quantified using flow cytometry (FACs). Dotted lines are controls without the fluorescent NBDG glucose analog. Note lack of statistical difference following treatment (p=0.54 for AKT inh. and p=0.29 for Rap.).

**A**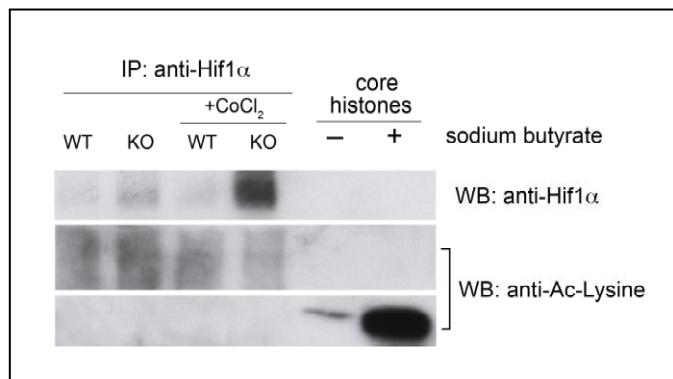**B**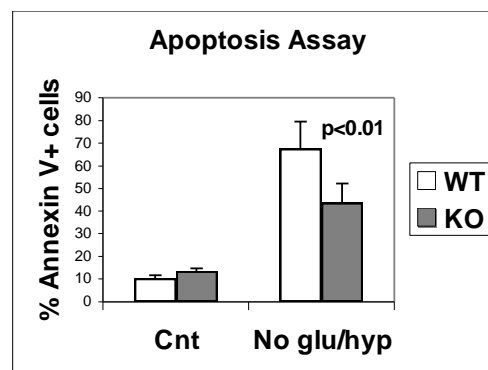**Figure S6 related to Figure 6.****A. Lack of acetylation in Hif1 $\alpha$** 

Hif1 $\alpha$  was immunoprecipitated from SIRT6 wild type (WT) and KO cells, and the samples were analyzed by western blots with antibodies against Hif1 $\alpha$  (Novus) and a pan-Acetyl Lysine (Cell Signaling). Note that even in the SIRT6 KO cells, where total Hif1 $\alpha$  levels were significantly increased, we failed to detect acetylation. Histones (untreated or treated with the deacetylase inhibitor butyrate) were used as controls for specificity of the pan-Acetyl Lysine antibody.

**B. SIRT6 KO cells are more resistant to Hypoxia/No Glucose-induced apoptosis.**

SIRT6 wild type (WT) and KO ES cells were cultured either in control ES medium (Cnt) or in medium without glucose in 1% oxygen for 24 hr. Apoptosis was measured by Annexin V staining (BD Pharmingen), as indicated by the manufacturer. Results are the average of three independent experiments. Error bars indicate the standard error of the mean.



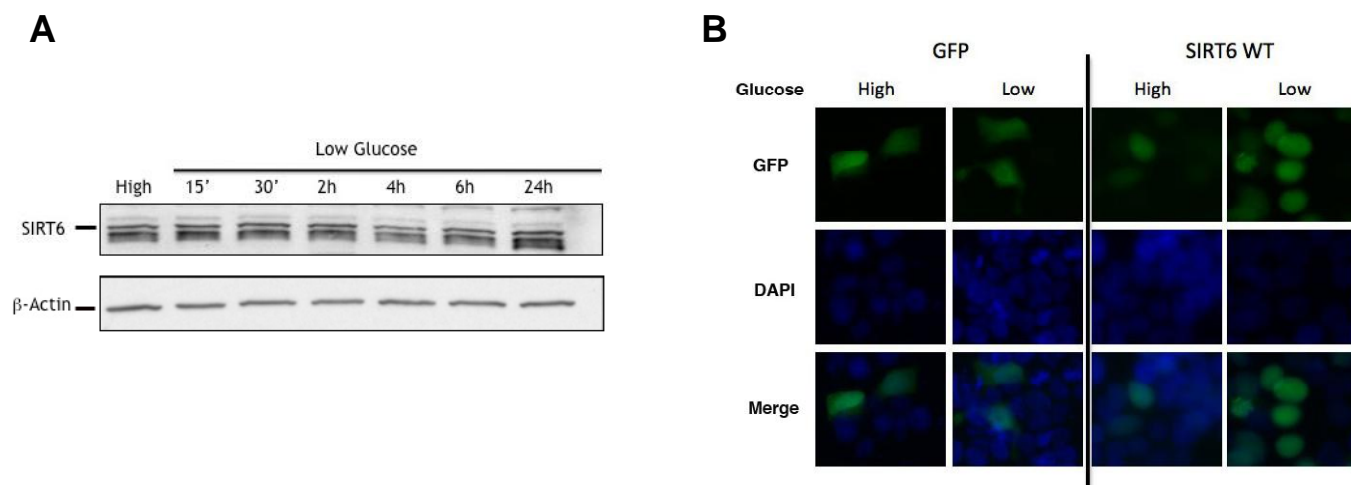

**Figure S7 related to Figure 7.**

Nutrient stress does not affect total protein levels or localization of SIRT6.

**A.** Total SIRT6 levels were assayed by Western blot, following glucose deprivation in ES cells.  $\beta$ -actin was used as loading control.

**B.** SIRT6-GFP was transfected into 293T cells, and localization of SIRT6 evaluated following glucose starvation. Note that SIRT6 localizes diffusely to the nucleus, as previously published (Mostoslavsky et al., 2006), and this pattern is not affected by nutrient stress. GFP-only vector was used as control (localizes both to nucleus and cytoplasm).

## **Supplemental Experimental Procedures**

### **ChIPs and Q-RT-PCR**

For Q-RT-PCR, total RNA was isolated using RNeasy Mini Kit (Qiagen) and cDNA was generated using QuantiTect Reverse Transcription Kit (Qiagen). Q-PCR was carried out using Brilliant SYBR Green QPCR Master Mix Kit (Stratagene). For ChIP assays, cells were fixed with 1% formaldehyde and harvested for whole-cell lysate preparation. Protein lysate was used for ChIP with the following antibodies: anti-SIRT6 antibody (Novus), anti-Hif1 $\alpha$  antibody (Novus) and anti-H3K9Ac antibody (Abcam). ChIP-enriched DNA was analyzed by Q-PCR as described above. High resolution ChIP analysis was carried out as described in (Donner et al., 2007), using the following antibodies: RNA polymerase II (Santa Cruz Biotechnology), S5P-CTD (Covance) and S2P-CTD (Covance). The primers' sequences for all the RT-PCRs are included in Supplementary Experimental Procedures.

### **Polysome Profiling Analysis**

Wildtype and KO ES cells were incubated with 0.1mg/mL cycloheximide for 10 minutes at 37°C in cell culture medium, after which cells were washed with ice-cold PBS containing 0.1mg/mL cycloheximide. Next, cytoplasmic extracts were prepared by douncing cells in 400uL of polysome lysis buffer (10mM NaCl, 15mM MgCl<sub>2</sub>, 10mM Tris-HCl (pH 7.5), 1.2% Triton X-100, 0.12% Deoxycholate, 0.1mg/mL heparin, and 0.1mg/mL cycloheximide). Cytoplasmic extracts were then layered over 15–45% sucrose gradients and centrifuged for 2.5 h at 37,000 rpm at 4°C in a Beckman SW41Ti rotor. Gradients were fractionated using an ISCO gradient fractionation system connected to an UV detector for continuous measurement of the absorbance at 254nm. Total RNA was isolated from each fraction using RNA STAT60 (Tel-test, Inc) and cDNA synthesis was performed on pooled RNA fractions using SuperScript II Reverse Transcriptase (Invitrogen). Subsequently, quantitative RT-PCR was performed to assess distribution of HIF1 alpha mRNA, which was normalized to 18S mRNA.

**Supplemental Table 1.****PCR primers for the ChIP assays.**

|                  |                         |
|------------------|-------------------------|
| LDHB-ChIP-5'     | AGAGAGAGCGCTTCGCATAG    |
| LDHB-ChIP-3'     | GGCTGGATGAGACAAAGAGC    |
| ALDOC-ChIP-5'    | AAGTGGGGCACTGTTAGGTG    |
| ALDOC-ChIP-3'    | GTTGGGGATTAAGCCTGGTT    |
| PFKM-ChIP-5'     | TTAAGACAAAGCCTGGCACA    |
| PFKM-ChIP-3'     | CAACCACAGCAATTGACCAC    |
| LDHA-ChIP-5'     | AGGGGGTGTGTGAAAACAAG    |
| LDHA-ChIP-3'     | ATGGCTTGCCAGCTTACATC    |
| LDHA-ChIP-1Kb-5' | TGCAAGACAAGTGTCCCTGT    |
| LDHA-ChIP-1Kb-3' | GAGGGAATGAAGCTCACAGC    |
| Pkd4-ChIP-F      | CTGTAGTCCCCCTTCCCTGT    |
| Pdk4-ChIP-R      | GAGCTTTTGGAGCAGACTGG    |
| Hif1 $\alpha$ -F | ACCTTCATCGGAAACTCAAAG   |
| Hif1 $\alpha$ -R | CTGTTAGGCTGGGAAAAGTTAGG |
